# Supplementary material for: Distinctive injury deaths: the role of environment, policy and measurement across states
Source: HighWire-hosted journal article supplement (doi:10.1136/injuryprev-2015-041833), 2016-01-24
Supplement: injuryprev-2015-041833supp1.pdf [file injuryprev-2015-041833supp1.pdf]

## Online Resource 1. Injury Codes and Descriptions

| <b>Categories for Main Analysis</b>          |              |                                                                                                                                                                                                                                                                                                                                                                               |
|----------------------------------------------|--------------|-------------------------------------------------------------------------------------------------------------------------------------------------------------------------------------------------------------------------------------------------------------------------------------------------------------------------------------------------------------------------------|
| Category                                     | ICD10 Codes  | Description                                                                                                                                                                                                                                                                                                                                                                   |
| Cut/Pierce, Unintentional                    | W25-W29, W45 | Includes unintentional cuts from contact with sharp glass, knives, sharp tools, household machinery, or other sharp household objects.                                                                                                                                                                                                                                        |
| Cut/Pierce, Suicide                          | X78          | Intentional self-harm by a sharp object.                                                                                                                                                                                                                                                                                                                                      |
| Cut/Pierce, Homicide                         | X99          | Assault by a sharp object.                                                                                                                                                                                                                                                                                                                                                    |
| Drowning, Unintentional                      | W65-W74      | Unintentional drowning in pool, bathtub, or other body of water.                                                                                                                                                                                                                                                                                                              |
| Drowning, Suicide                            | X71          | Intentional self-harm by drowning in pool, bathtub, or other body of water.                                                                                                                                                                                                                                                                                                   |
| Drowning, Homicide                           | X92          | Assault by drowning and submersion.                                                                                                                                                                                                                                                                                                                                           |
| Fall, Unintentional                          | W00-W19      | Includes slipping on ice or other slippery surface, tripping, falls due to non-transport collisions (colliding with a person or object), being unintentionally dropped by another person, falling from furniture (ex: bed, chair), playground equipment, a building, a bridge, a tree, a cliff, falling down stairs or a ladder, or any other fall from one level to another. |
| Fall, Suicide                                | X80          | Intentional self-harm by jumping from a high place.                                                                                                                                                                                                                                                                                                                           |
| Fire, hot object or substance, Unintentional | X00-X19      | Exposure to fire, melting of clothes, contact with hot substances (ex: hot drinks, hot food, steam, heating appliances).                                                                                                                                                                                                                                                      |
| Fire, hot object or substance, Suicide       | X76-X77      | Intentional self-harm by smoke, fire and flames, steam, or other hot objects.                                                                                                                                                                                                                                                                                                 |

|                                         |                                                       |                                                                                                                                                                                                                                            |
|-----------------------------------------|-------------------------------------------------------|--------------------------------------------------------------------------------------------------------------------------------------------------------------------------------------------------------------------------------------------|
| Fire, hot object or substance, Homicide | X97-X98,U01.3                                         | Assault by smoke, fire, and flames, steam, or other hot objects (includes arson). Terrorism from fire, petrol bomb, or hot objects.                                                                                                        |
| Firearm, Unintentional                  | W32-W34                                               | Unintentional discharge or malfunction from a gun or other firearm.                                                                                                                                                                        |
| Firearm, Suicide                        | X72-X74                                               | Intentional self-harm from gun or other firearm.                                                                                                                                                                                           |
| Firearm, Homicide                       | X93-X95, U01.4                                        | Assault or terrorism from gun or other firearm.                                                                                                                                                                                            |
| Firearm, Legal Intervention             | Y35.0                                                 | Any injury sustained as a result of an encounter with any law enforcement official, serving in any capacity at the time of the encounter, whether on-duty or off-duty. Includes: injury to law enforcement official, suspect and bystander |
| Machinery (Unintentional)               | W24, W30-W31                                          | Injury from contact with agriculture, construction, or other machinery.                                                                                                                                                                    |
| Natural, Environmental                  | W42,W43,W53-W64,W92-W99,X20-X39,X51-X57               | Exposure to noise, animal attacks, injury by plant contact, exposure to extreme temperatures or air pressures, lack of food, lack of water                                                                                                 |
| Motor vehicle, homicide                 | Y03, U01.1                                            | Assault of crashing by a motor vehicle, being run over by a motor vehicle, or other assault by a motor vehicle, destruction or intentional crashing of an aircraft.                                                                        |
| Motor vehicle, suicide                  | X82                                                   | Intentional self-harm by crashing a motor vehicle.                                                                                                                                                                                         |
| Motor vehicle, occupant, unintentional  | V30-V86                                               | Injured occupant of a three-wheeled motor vehicle, car, truck, van, heavy transport vehicle, bus, or industrial transport vehicle in crash.                                                                                                |
| Motorcyclist, unintentional             | V20-V29                                               | Injured motorcyclist in crash.                                                                                                                                                                                                             |
| Pedal cyclist, unintentional            | V10-V11, V12-V14 (.0-.2) V15-V18, V19 (.0-.3, .8, .9) | Injured pedal cyclist in crash.                                                                                                                                                                                                            |

|                                                |                                                                     |                                                                                                                                                                 |
|------------------------------------------------|---------------------------------------------------------------------|-----------------------------------------------------------------------------------------------------------------------------------------------------------------|
| Pedestrian, unintentional                      | V01, V02-V04 (.0), V05, V06, V09 (.0,.1,.3,.9)                      | Pedestrian injured in any type of crash                                                                                                                         |
| Drug Poisoning, Unintentional                  | X40-X44                                                             | Unintentional poisoning from medical and illicit drugs.                                                                                                         |
| Drug Poisoning, Homicide                       | X85                                                                 | Homicidal poisoning by any drug.                                                                                                                                |
| Drug Poisoning, Suicide                        | X60-X64                                                             | Intentional self-poisoning by any drug.                                                                                                                         |
| Non-drug Poisoning, Unintentional              | X45-X49                                                             | Unintentional poisoning by alcohol, gasses, pesticides, or other noxious substances.                                                                            |
| Non-drug Poisoning, Homicide                   | X86-X90, U01(.6,.7)                                                 | Assault by pesticides, bioweapons or other noxious substances.                                                                                                  |
| Non-drug Poisoning, Suicide                    | X65-X69                                                             | Intentional self-poisoning by alcohol, gasses, pesticides, or other noxious substances.                                                                         |
| Other Transportation, Unintentional            | V80 (.3-.5),V81.1 V82.1                                             | Fatal injury involving transportation by riding an animal, an animal pulled vehicle, a train, or a streetcar.                                                   |
| Struck by/against, homicide                    | Y00, Y04                                                            | Struck with a blunt object or bodily force                                                                                                                      |
| Struck by/again, unintentional                 | W20-W22,W50-W52                                                     | Struck by a thrown or flying object, non-fire building collapse, struck against an object, unintentionally hit, struck, or crushed by another person or people. |
| Suffocation, unintentional                     | W75-W84                                                             | Accidental suffocation, hanging, strangulation, choking, prolonged exposure to a low-oxygen environment, or other threat to breathing.                          |
| Suffocation, homicide                          | X91                                                                 | Assault by hanging, strangulation, and suffocation                                                                                                              |
| Suffocation, suicide                           | X70                                                                 | Intentional self-harm by hanging, strangulation and suffocation.                                                                                                |
| <b>Additional Indefinite Injury Categories</b> |                                                                     |                                                                                                                                                                 |
| Other specified injuries                       | X58,Y86,X83,Y87.0,Y08,Y87.1,Y33, Y87.2,Y35.6,Y89(.0,.1), U01.8, U02 | Exposure to other specified factors, sequelae from other specified injuries.                                                                                    |
| Unspecified Injuries                           | X59,X84,Y09,Y34,Y89.9,Y35.7,Y36.9, U01.9, U03.9                     | Exposure to other unspecified factors, other unspecified injuries.                                                                                              |

|                                              |                  |                                                                                                                                                     |
|----------------------------------------------|------------------|-----------------------------------------------------------------------------------------------------------------------------------------------------|
| Drowning,<br>Undetermined<br>Intent          | Y21              | Drowning of undetermined<br>intent.                                                                                                                 |
| Drug Poisoning,<br>Undetermined<br>Intent    | Y10-Y14          | Drug poisoning of unspecified<br>intent.                                                                                                            |
| Non-drug<br>Poisoning,<br>Unspecified Intent | Y15-19           | Non-drug poisoning of<br>undetermined intent.                                                                                                       |
| Fire/Hot Object,<br>Undetermined<br>Intent   | Y26-Y27          | Fire/hot object death of<br>undetermined intent.                                                                                                    |
| Fall,<br>Undetermined<br>Intent              | Y30              | Fall of undetermined intent.                                                                                                                        |
| Firearm,<br>Undetermined<br>Intent           | Y22-Y24          | Firearm of undetermined<br>intent.                                                                                                                  |
| Suffocation,<br>Undetermined<br>Intent       | Y20              | Suffocation of undetermined<br>intent.                                                                                                              |
| Motor Vehicle,<br>Unspecified                | V87(.0-.8),V89.2 | Motor vehicle crash with<br>unspecified person killed<br>(unspecified if the person<br>killed was a vehicle occupant,<br>pedestrian, cyclist, etc.) |
